# Supplementary material for: AI-dente: an open machine learning based tool to interpret nano-indentation data of soft tissues and materials
Source: Royal Society of Chemistry journal article supplement (doi:10.1039/d3sm00402c), 2023-01-01
Supplement: d3sm00402c1.pdf [file d3sm00402c1.pdf]

## SUPPLEMENTARY INFORMATION

AI-dente: An Open Machine Learning Based Tool to Interpret Nano-indentation Data of Soft Tissues and Materials

Giolando et al.

The University of Texas at Austin

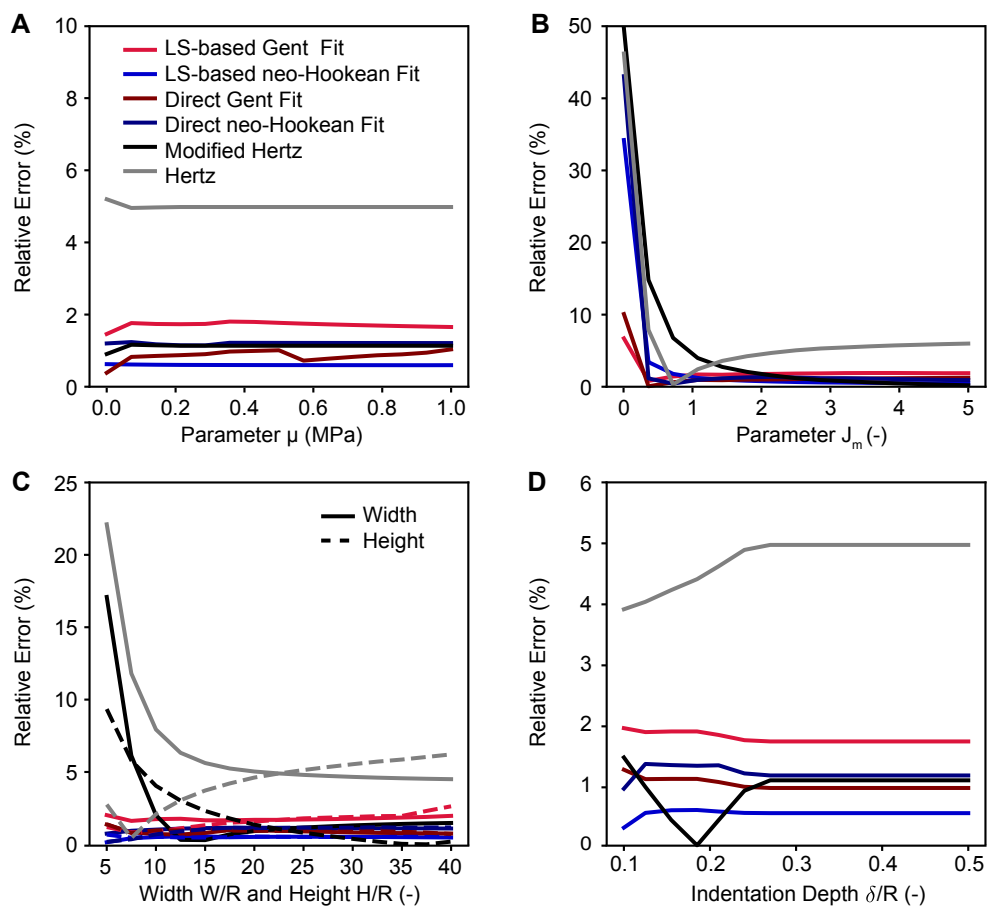

**Figure S1:** Sensitivity of shear modulus identifiability for all methods. The error between the predicted and the ground truth shear modulus as a function of A) sample shear modulus, B) stiffening parameter, C) sample width and height, and D) indentation depth.

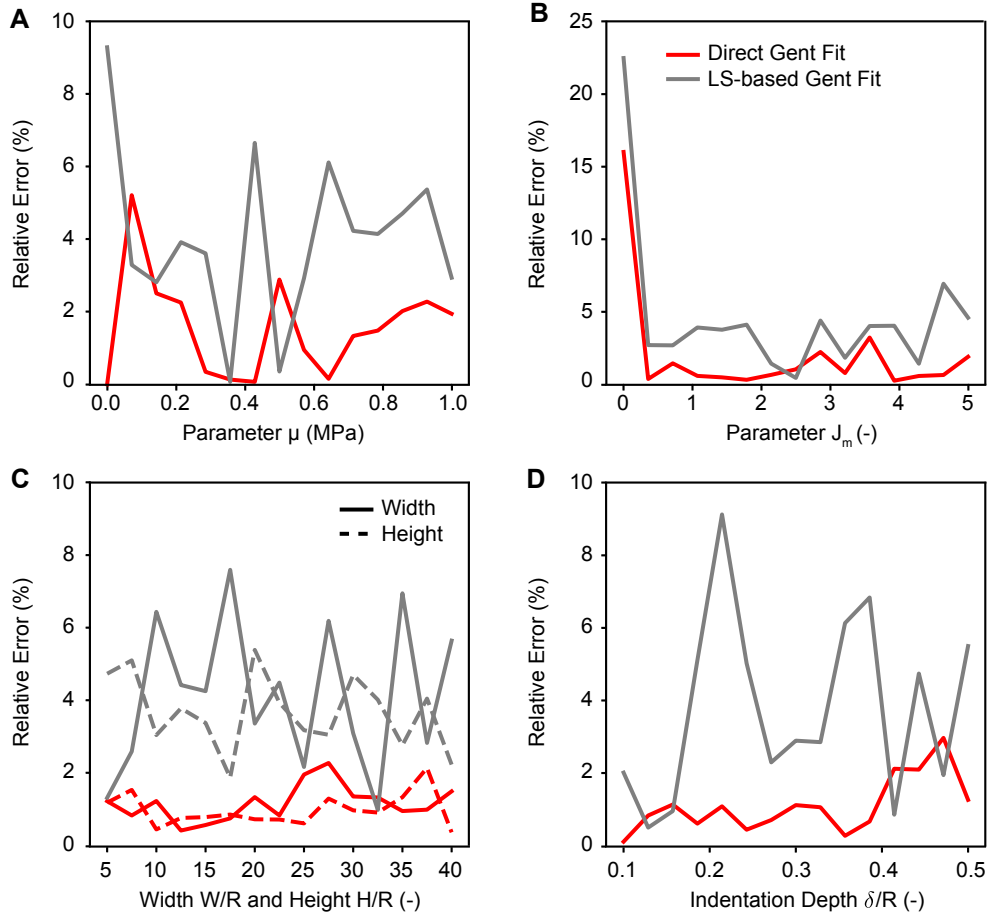

**Figure S2:** Sensitivity of stiffening parameter  $J_m$  identifiability for all methods. The error between the predicted and the ground truth stiffening parameter as a function of A) sample shear modulus, B) stiffening parameter, C) sample width and height, and D) indentation depth.
